# Supplementary material for: Phase relation, structure and ionic conductivity of Li7−x−3yAlyLa3Zr2−xTaxO12
Source: Royal Society of Chemistry journal article supplement (doi:10.1039/c6ra13317g), 2016-01-01
Supplement: c6ra13317g1.pdf [file c6ra13317g1.pdf]

## Supporting Information

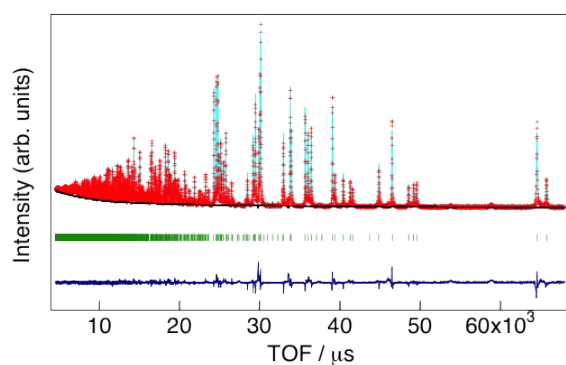

Fig. S1. Observed, calculated and difference plots for the Rietveld analysis of  $\text{Li}_7\text{La}_3\text{Zr}_2\text{O}_{12}$ .

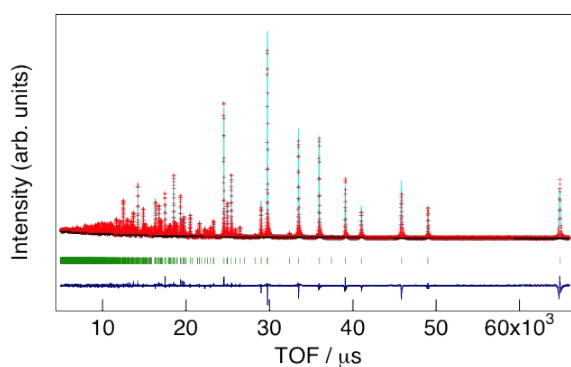

Fig. S2. Observed, calculated and difference plots for the Rietveld analysis of  $\text{Li}_{6.6}\text{La}_3\text{Zr}_{1.6}\text{Ta}_{0.4}\text{O}_{12}$ .

Table S1. Atomic coordinates of Li<sub>7</sub>La<sub>3</sub>Zr<sub>2</sub>O<sub>12</sub>.

| Atom | Site        | <i>g</i> | <i>x</i>    | <i>y</i>             | <i>z</i>   | <i>B</i> / Å <sup>2</sup> |
|------|-------------|----------|-------------|----------------------|------------|---------------------------|
| Li1  | 8 <i>a</i>  | 1        | 0           | 1/4                  | 3/8        | 1.04(4)                   |
| Li2  | 16 <i>f</i> | 1        | 0.17949(9)  | = <i>x</i> (Li2)+1/4 | 1/8        | 1.44(3)                   |
| Li3  | 32 <i>g</i> | 1        | 0.08113(9)  | 0.08748(9)           | 0.80474(9) | 1.10(2)                   |
| La1  | 8 <i>b</i>  | 1        | 0           | 1/4                  | 1/8        | 0.371(7)                  |
| La2  | 16 <i>e</i> | 1        | 0.12722(2)  | 0                    | 1/4        | 0.385(5)                  |
| Zr   | 16 <i>c</i> | 1        | 0           | 0                    | 0          | 0.334(5)                  |
| O1   | 32 <i>g</i> | 1        | -0.03440(3) | 0.05513(2)           | 0.15273(3) | 0.516(5)                  |
| O2   | 32 <i>g</i> | 1        | 0.05416(3)  | 0.85237(3)           | 0.53382(3) | 0.539(6)                  |
| O3   | 32 <i>g</i> | 1        | 0.14992(3)  | 0.02765(3)           | 0.44702(3) | 0.536(6)                  |

Space group: *I4*<sub>1</sub>/*acd* (142-2): *a* = 13.1247(11) Å, *c* = 12.6640(16) Å, *R*<sub>wp</sub> = 6.69%, *R*<sub>p</sub> = 5.28%, *R*<sub>B</sub> = 4.16%, *R*<sub>F</sub> = 4.00%,  $\chi^2$  = 5.16.

Table S2. Atomic coordinates of Li<sub>6.6</sub>La<sub>3</sub>Zr<sub>1.6</sub>Ta<sub>0.4</sub>O<sub>12</sub>.

| Atom | Site        | <i>g</i> | <i>x</i>   | <i>y</i>   | <i>z</i>   | <i>B</i> / Å <sup>2</sup> |
|------|-------------|----------|------------|------------|------------|---------------------------|
| Li1  | 24 <i>d</i> | 0.367(6) | 3/8        | 0          | 1/4        | 2.11(8)                   |
| Li2  | 96 <i>h</i> | 0.456(3) | 0.0973(16) | 0.6886(18) | 0.5789(16) | 1.48(6)                   |
| La1  | 24 <i>c</i> | 1        | 1/8        | 0          | 1/4        | 0.436(7)                  |
| Zr   | 16 <i>a</i> | 0.8      | 0          | 0          | 0          | = <i>B</i> (Ta)           |
| Ta   | 16 <i>a</i> | 0.2      | 0          | 0          | 0          | 0.436(7)                  |
| O1   | 96 <i>h</i> | 1        | 0.28148(2) | 0.10117(2) | 0.19656(2) | 0.857(7)                  |

Space group: *Ia*-3*d* (230): *a* = 12.94191(10) Å, *R*<sub>wp</sub> = 8.91%, *R*<sub>p</sub> = 4.56%, *R*<sub>B</sub> = 3.34%, *R*<sub>F</sub> = 3.26%,  $\chi^2$  = 3.81.
